# Supplementary material for: Systematic identification and characterization of regulatory elements derived from human endogenous retroviruses
Source: PLoS Genet. 2017 Jul 12;13(7):e1006883. doi: 10.1371/journal.pgen.1006883 (PMC5529029; doi:10.1371/journal.pgen.1006883)
Supplement: S8 Table — (XLSX) [file pgen.1006883.s027.xlsx]

## Sheet: Sheet1
TF	Cell	Treatment	Source	ChIP file (experiment Id)	Input control file (experiment Id)	# of TFBSs (all-read)	# of HERV-TFBSs (all-read)	# of TFBSs (unique-read)	# of HERV-TFBSs (unqiue-read)
ATF3	GM12878	None	ENCODE	ENCSR000BJY	ENCSR000BMS	4392	576	4015	549
ATF3	H1-hESC	None	ENCODE	ENCSR000BKC	ENCSR000BHL	7221	947	7599	1002
ATF3	HepG2	None	ENCODE	ENCSR000BKE	ENCSR000BLG	5015	315	5068	321
ATF3	K562	None	ENCODE	ENCSR000BNU	ENCSR000BLJ	17392	2029	18677	2119
ATF3	A549	ethanol	ENCODE	ENCSR000BPS	ENCSR000BPD	18588	746	19741	770
BATF	GM12878	None	ENCODE	ENCSR000BGT	ENCSR000BGH	85404	10025	84914	9772
BCL11A	GM12878	None	ENCODE	ENCSR000BHA	ENCSR000BGH	59200	5513	59670	5416
BCL11A	H1-hESC	None	ENCODE	ENCSR000BIP	ENCSR000BHL	2181	514	4754	1028
BCL11A	H1-hESC	None	ENCODE	ENCSR000BMJ	ENCSR000BHL	1546	267	2946	531
BCL3	GM12878	None	ENCODE	ENCSR000BNQ	ENCSR000BMS	40931	3557	41073	3538
BCL3	A549	ethanol	ENCODE	ENCSR000BQH	ENCSR000BPD	35659	1863	41411	2226
BCLAF1	GM12878	None	ENCODE	ENCSR000BJZ	ENCSR000BMS	27898	1830	19393	1208
BCLAF1	K562	None	ENCODE	ENCSR000BKH	ENCSR000BLJ	7796	720	7709	642
BHLHE40	HepG2	None	ENCODE	ENCSR000BID	ENCSR000BLG	4821	258	4927	293
BHLHE40	A549	None	ENCODE	ENCSR000DYJ	ENCSR496AXR	2201	65	2955	101
BHLHE40	HepG2	None	ENCODE	ENCSR000EDT	ENCSR000EEN	34671	2237	33789	2012
BHLHE40	K562	None	ENCODE	ENCSR000EGV	ENCSR000EHI	41200	4192	38961	3633
BRCA1	GM12878	None	ENCODE	ENCSR000DZS	ENCSR000EAF	365	8	497	13
BRCA1	H1-hESC	None	ENCODE	ENCSR000EBX	ENCSR000ECG	1591	67	2480	109
BRCA1	HeLa-S3	None	ENCODE	ENCSR000EDB	ENCSR000EDI	16464	841	12692	624
BRCA1	HepG2	None	ENCODE	ENCSR000EDY	ENCSR000EEN	1449	31	3470	60
CEBPB	HepG2	None	ENCODE	ENCSR000BQI	ENCSR000BLG	52438	4070	41662	3556
CEBPB	K562	None	ENCODE	ENCSR000BRQ	ENCSR000BRJ	66832	8540	63716	7939
CEBPB	GM12878	None	ENCODE	ENCSR000BRX	ENCSR000BVP	24959	1519	27481	1626
CEBPB	A549	None	ENCODE	ENCSR000DYI	ENCSR496AXR	116663	11705	111807	11410
CEBPB	H1-hESC	None	ENCODE	ENCSR000EBV	ENCSR000ECG	38714	4327	34459	3835
CEBPB	HeLa-S3	None	ENCODE	ENCSR000EDA	ENCSR000EDI	182108	18711	147494	14970
CEBPB	HepG2	None	ENCODE	ENCSR000EEE	ENCSR000EEN	166270	16520	160299	16592
CEBPB	IMR90	None	ENCODE	ENCSR000EFM	ENCSR000EFL	226197	22058	214675	21387
CEBPB	K562	None	ENCODE	ENCSR000EHE	ENCSR000EHI	95429	10069	87414	9512
CTCF	MCF-7	None	ENCODE	ENCSR000AHD	ENCSR000AHE	58720	6563	56200	6162
CTCF	GM12878	None	ENCODE	ENCSR000AKB	ENCSR000AKJ	37885	3822	38672	3795
CTCF	K562	None	ENCODE	ENCSR000AKO	ENCSR000AKY	66610	9172	65215	8813
CTCF	NHEK	None	ENCODE	ENCSR000ALJ	ENCSR000ALS	70212	8343	66585	7582
CTCF	HMEC	None	ENCODE	ENCSR000ALV	ENCSR000AMN	47232	5018	42340	4069
CTCF	HepG2	None	ENCODE	ENCSR000AMA	ENCSR055XHN	70551	8882	66849	8195
CTCF	HSMM	None	ENCODE	ENCSR000ANE	ENCSR000ANN	64433	7009	57706	5823
CTCF	NHLF	None	ENCODE	ENCSR000ANO	ENCSR000AMZ	46612	4333	44705	3855
CTCF	HSMMtube	None	ENCODE	ENCSR000ANS	ENCSR000ANT	59245	6944	57970	6541
CTCF	HeLa-S3	None	ENCODE	ENCSR000AOA	ENCSR000AOB	69526	10171	69649	9845
CTCF	NH-A	None	ENCODE	ENCSR000AOO	ENCSR000AOP	45269	4698	45127	4469
CTCF	Osteobl	None	ENCODE	ENCSR000APF	ENCSR000APU	68625	8615	68659	8271
CTCF	NHDF-Ad	None	ENCODE	ENCSR000APM	ENCSR000APT	50241	5300	47250	4596
CTCF	Dnd41	None	ENCODE	ENCSR000AQU	ENCSR000ASA	81638	9811	78142	8857
CTCF	A549	dexamethasone	ENCODE	ENCSR000BHV	ENCSR000BNB	40058	3458	39115	3135
CTCF	A549	ethanol	ENCODE	ENCSR000BHW	ENCSR000BNC	39879	3580	39004	3256
CTCF	HepG2	None	ENCODE	ENCSR000BIE	ENCSR000BLG	78064	8992	76942	8548
CTCF	SK-N-SH_RA	all-trans-retinoic acid	ENCODE	ENCSR000BLX	ENCSR000BLQ	59062	5483	56654	4893
CTCF	H1-hESC	None	ENCODE	ENCSR000BNH	ENCSR000BHL	51489	5737	51520	5533
CTCF	T-47D	dimethyl sulfoxide	ENCODE	ENCSR000BNO	ENCSR000BMP	30698	2428	30797	2309
CTCF	K562	None	ENCODE	ENCSR000BPJ	ENCSR000BGG	58817	6880	55811	6283
CTCF	ECC-1	dimethyl sulfoxide	ENCODE	ENCSR000BQE	ENCSR000BKX	22051	1483	21704	1348
CTCF	Gliobla	None	ENCODE	ENCSR000DKN	ENCSR000DKO	74762	8474	72826	7942
CTCF	K562	None	ENCODE	ENCSR000DMA	ENCSR000DMB	75426	8648	75959	8390
CTCF	MCF-7	None	ENCODE	ENCSR000DML	ENCSR000DMW	80357	7352	85448	7728
CTCF	MCF-7	None	ENCODE	ENCSR000DMO	ENCSR000DMW	137695	9908	126660	10075
CTCF	MCF-7	None	ENCODE	ENCSR000DMR	ENCSR000DMW	81481	9997	79847	9544
CTCF	MCF-7	17β-estradiol	ENCODE	ENCSR000DMS	ENCSR000DMW	56231	6263	56105	6105
CTCF	MCF-7	None	ENCODE	ENCSR000DMV	ENCSR000DMW	102952	10067	103909	10321
CTCF	A549	None	ENCODE	ENCSR000DNA	ENCSR000DNB	60841	6282	59477	5986
CTCF	A549	None	ENCODE	ENCSR000DPF	ENCSR000DPE	70290	8961	69284	8495
CTCF	AG04449	None	ENCODE	ENCSR000DPG	ENCSR000DPH	61338	4717	58977	4268
CTCF	AG04450	None	ENCODE	ENCSR000DPM	ENCSR000DPN	48235	4591	48567	4346
CTCF	AG09309	None	ENCODE	ENCSR000DPP	ENCSR000DPQ	38413	3433	36132	2932
CTCF	AG09319	None	ENCODE	ENCSR000DPS	ENCSR000DPT	58281	5489	56350	5003
CTCF	AG10803	None	ENCODE	ENCSR000DPV	ENCSR000DPW	47536	4327	47524	4104
CTCF	AoAF	None	ENCODE	ENCSR000DPY	ENCSR000DPZ	51823	4489	53545	4333
CTCF	BE2_C	None	ENCODE	ENCSR000DQD	ENCSR000DQC	58411	7260	58661	6993
CTCF	BJ	None	ENCODE	ENCSR000DQI	ENCSR000DQE	57234	5599	55067	5010
CTCF	Caco-2	None	ENCODE	ENCSR000DQN	ENCSR000DQJ	48630	4473	46368	3945
CTCF	GM06990	None	ENCODE	ENCSR000DQW	ENCSR000DQS	53535	5870	52830	5415
CTCF	GM12801	None	ENCODE	ENCSR000DQY	ENCSR000DQX	24350	1696	23796	1510
CTCF	GM12864	None	ENCODE	ENCSR000DRB	ENCSR000DRA	46726	5024	44771	4516
CTCF	GM12865	None	ENCODE	ENCSR000DRE	ENCSR000DRD	42713	4112	41064	3667
CTCF	GM12872	None	ENCODE	ENCSR000DRN	ENCSR000DRM	44922	4815	42602	4279
CTCF	GM12873	None	ENCODE	ENCSR000DRP	ENCSR000DRO	55373	6261	52615	5573
CTCF	GM12874	None	ENCODE	ENCSR000DRR	ENCSR000DRQ	54552	5551	53314	5172
CTCF	GM12875	None	ENCODE	ENCSR000DRU	ENCSR000DRT	48986	4859	50597	4830
CTCF	GM12878	None	ENCODE	ENCSR000DRZ	ENCSR000DRV	46188	4463	46464	4241
CTCF	HA-sp	None	ENCODE	ENCSR000DSU	ENCSR000DSV	59743	5837	61092	5724
CTCF	HAc	None	ENCODE	ENCSR000DSZ	ENCSR000DSX	56080	5816	53986	5248
CTCF	HBMEC	None	ENCODE	ENCSR000DTA	ENCSR000DTB	76526	8317	75751	7821
CTCF	HCFaa	None	ENCODE	ENCSR000DTF	ENCSR000DTG	64761	6617	62272	6065
CTCF	HCM	None	ENCODE	ENCSR000DTI	ENCSR000DTJ	56567	6095	54308	5511
CTCF	HCPEpiC	None	ENCODE	ENCSR000DTL	ENCSR000DTM	68994	7314	68649	6864
CTCF	HCT-116	None	ENCODE	ENCSR000DTO	ENCSR000DTP	57008	6796	54837	6264
CTCF	HEEpiC	None	ENCODE	ENCSR000DTR	ENCSR000DTS	45296	4520	43461	4041
CTCF	HEK293	None	ENCODE	ENCSR000DTW	ENCSR000DTV	71607	8825	70268	8358
CTCF	HeLa-S3	None	ENCODE	ENCSR000DUB	ENCSR000DTX	63237	6949	63081	6674
CTCF	HepG2	None	ENCODE	ENCSR000DUG	ENCSR000DUC	68232	7765	68628	7652
CTCF	HFF	None	ENCODE	ENCSR000DUH	ENCSR000DUI	51447	5160	49415	4650
CTCF	HFF-Myc	None	ENCODE	ENCSR000DUM	ENCSR000DUL	44949	5071	43975	4719
CTCF	HL-60	None	ENCODE	ENCSR000DUP	ENCSR000DUN	40758	3889	39183	3520
CTCF	HMEC	None	ENCODE	ENCSR000DUS	ENCSR000DUR	60915	6384	57404	5616
CTCF	HMF	None	ENCODE	ENCSR000DUU	ENCSR000DUV	48922	4920	47023	4428
CTCF	HPAF	None	ENCODE	ENCSR000DUX	ENCSR000DUY	60752	6525	56457	5683
CTCF	HPF	None	ENCODE	ENCSR000DVA	ENCSR000DVB	44786	3972	44191	3709
CTCF	HRE	None	ENCODE	ENCSR000DVH	ENCSR000DVD	68939	7350	67671	6882
CTCF	HRPEpiC	None	ENCODE	ENCSR000DVI	ENCSR000DVJ	55509	5546	55575	5285
CTCF	HUVEC	None	ENCODE	ENCSR000DVP	ENCSR000DVL	62256	5788	59344	5141
CTCF	HVMF	None	ENCODE	ENCSR000DVQ	ENCSR000DVR	57777	6405	58368	6184
CTCF	K562	None	ENCODE	ENCSR000DWE	ENCSR000DWA	51523	5452	50517	5059
CTCF	MCF-7	None	ENCODE	ENCSR000DWH	ENCSR000DWI	69394	8730	68251	8302
CTCF	NB4	None	ENCODE	ENCSR000DWN	ENCSR000DWO	50486	5619	52381	5579
CTCF	NHDF-neo	None	ENCODE	ENCSR000DWQ	ENCSR000DWR	52840	5112	51403	4655
CTCF	NHEK	None	ENCODE	ENCSR000DWX	ENCSR000DWT	72152	8539	70948	8050
CTCF	RPTEC	None	ENCODE	ENCSR000DXD	ENCSR000DXE	68215	8768	67049	8307
CTCF	SAEC	None	ENCODE	ENCSR000DXI	ENCSR000DXG	75705	7541	72188	6803
CTCF	SK-N-SH_RA	all-trans-retinoic acid	ENCODE	ENCSR000DXQ	ENCSR000DXN	82016	7275	82787	6994
CTCF	WERI-Rb-1	None	ENCODE	ENCSR000DXW	ENCSR000DXV	69244	7905	67363	7451
CTCF	WI-38	None	ENCODE	ENCSR000DYB	ENCSR000DYA	31228	2842	31720	2698
CTCF	A549	None	ENCODE	ENCSR000DYD	ENCSR496AXR	50932	4853	48226	4305
CTCF	IMR90	None	ENCODE	ENCSR000EFI	ENCSR000EFL	56253	5228	55175	4866
CTCF	K562	None	ENCODE	ENCSR000EGM	ENCSR000EHI	64567	7053	62758	6471
CTCF	SK-N-SH_RA	None	ENCODE	ENCSR000EIC	ENCSR000EHU	58972	5661	54542	4843
CTCFL	K562	None	ENCODE	ENCSR000BNK	ENCSR000BLJ	29365	2357	25080	1840
E2F4	MCF10A-Er-Src	afimoxifene	ENCODE	ENCSR000DOR	ENCSR000DOL	27383	1535	27083	1326
E2F4	GM12878	None	ENCODE	ENCSR000DYY	ENCSR000EAF	970	20	925	19
E2F4	HeLa-S3	None	ENCODE	ENCSR000EVL	ENCSR000EZM	2403	46	1734	33
E2F4	K562	None	ENCODE	ENCSR000EWL	ENCSR000EWK	36936	1555	38390	1623
E2F6	K562	None	ENCODE	ENCSR000BLI	ENCSR000BGG	54207	5384	48118	4648
E2F6	HeLa-S3	None	ENCODE	ENCSR000EVK	ENCSR000EZM	6039	220	5544	298
E2F6	K562	None	ENCODE	ENCSR000EWJ	ENCSR000EWK	52161	5195	49046	4675
EBF1	GM12878	None	ENCODE	ENCSR000BGU	ENCSR000BGH	101231	10787	97736	9996
EGR1	H1-hESC	None	ENCODE	ENCSR000BJA	ENCSR000BHL	11151	376	10625	350
EGR1	GM12878	None	ENCODE	ENCSR000BMQ	ENCSR000BMS	24204	625	22615	549
EGR1	K562	None	ENCODE	ENCSR000BNE	ENCSR000BLJ	52097	3466	49564	3172
ELF1	GM12878	None	ENCODE	ENCSR000BMB	ENCSR000BMS	55129	2537	54629	2553
ELF1	K562	None	ENCODE	ENCSR000BMD	ENCSR000BGG	60291	9071	55895	8575
ELF1	HepG2	None	ENCODE	ENCSR000BMZ	ENCSR000BLG	42756	3400	42051	3333
ELF1	A549	ethanol	ENCODE	ENCSR000BPT	ENCSR000BPD	17378	695	17709	710
ELK4	HEK293	None	ENCODE	ENCSR000EVB	ENCSR000EVA	71	2	299	11
ELK4	HeLa-S3	None	ENCODE	ENCSR000EVI	ENCSR000EVH	7455	283	8106	300
ESR1	ECC-1	estradiol	ENCODE	ENCSR000BIY	ENCSR000BKX	30260	3420	29821	3103
ESR1	ECC-1	dimethyl sulfoxide	ENCODE	ENCSR000BIZ	ENCSR000BKX	3604	210	3914	229
ESR1	T-47D	genistein	ENCODE	ENCSR000BJS	ENCSR000BMP	15701	1858	16532	1839
ESR1	ECC-1	genistein	ENCODE	ENCSR000BKL	ENCSR000BKX	25141	2515	24402	2253
ESR1	T-47D	estradiol	ENCODE	ENCSR000BKN	ENCSR000BMP	22410	2865	25103	3003
ESR1	T-47D	dimethyl sulfoxide	ENCODE	ENCSR000BLL	ENCSR000BMP	3159	248	4798	385
ESR1	T-47D	bisphenol A	ENCODE	ENCSR000BQD	ENCSR000BMP	5719	724	6098	749
ESR1	ECC-1	bisphenol A	ENCODE	ENCSR000BQR	ENCSR000BKX	10438	851	10969	836
ETS1	GM12878	None	ENCODE	ENCSR000BKA	ENCSR000BMS	12599	542	9899	389
ETS1	K562	None	ENCODE	ENCSR000BKQ	ENCSR000BLJ	23006	705	26858	904
ETS1	A549	ethanol	ENCODE	ENCSR000BPU	ENCSR000BPD	18372	612	19634	654
FOS	K562	None	ENCODE	ENCSR000DKB	ENCSR828WYU	12785	1596	12379	1508
FOS	MCF10A-Er-Src	afimoxifene	ENCODE	ENCSR000DON	ENCSR000DOL	99568	11981	98538	11577
FOS	MCF10A-Er-Src	afimoxifene	ENCODE	ENCSR000DOO	ENCSR000DOL	119928	14510	113673	13385
FOS	MCF10A-Er-Src	afimoxifene	ENCODE	ENCSR000DOP	ENCSR000DOL	132367	16876	127643	15841
FOS	MCF10A-Er-Src	ethanol	ENCODE	ENCSR000DOT	ENCSR000DOL	104535	11778	104156	11450
FOS	HUVEC	None	ENCODE	ENCSR000EVU	ENCSR000EVV	64007	7279	63244	7059
FOS	GM12878	None	ENCODE	ENCSR000EYZ	ENCSR000EYX	2454	232	2056	182
FOS	HeLa-S3	None	ENCODE	ENCSR000EZE	ENCSR000EZM	37774	4196	33733	3617
FOSL1	K562	None	ENCODE	ENCSR000BMV	ENCSR000BLJ	17219	2077	20122	2287
FOSL1	H1-hESC	None	ENCODE	ENCSR000BNS	ENCSR000BHL	1132	147	1908	131
FOSL2	HepG2	None	ENCODE	ENCSR000BHP	ENCSR000BLN	75435	6990	72019	6306
FOSL2	A549	ethanol	ENCODE	ENCSR000BQO	ENCSR000BPD	62463	5028	62100	4800
FOXA1	ECC-1	dimethyl sulfoxide	ENCODE	ENCSR000BKW	ENCSR000BKX	6089	479	6258	478
FOXA1	T-47D	dimethyl sulfoxide	ENCODE	ENCSR000BKY	ENCSR000BMP	112019	11205	107755	10044
FOXA1	HepG2	None	ENCODE	ENCSR000BLE	ENCSR000BLG	125253	13943	115124	12021
FOXA1	HepG2	None	ENCODE	ENCSR000BMO	ENCSR000BLG	105550	11523	96270	9979
FOXA1	A549	dexamethasone	ENCODE	ENCSR000BPX	ENCSR000BPN	44644	4219	44429	3665
FOXA1	A549	ethanol	ENCODE	ENCSR000BRD	ENCSR000BPN	43680	4270	41172	3475
FOXA2	HepG2	None	ENCODE	ENCSR000BNI	ENCSR000BLG	119352	12763	106438	10676
FOXP2	PFSK-1	None	ENCODE	ENCSR000BGA	ENCSR000BJU	49063	1718	41361	1363
FOXP2	SK-N-MC	None	ENCODE	ENCSR000BGB	ENCSR000BOD	10	1	14	1
GABPA	GM12878	None	ENCODE	ENCSR000BGC	ENCSR000BGJ	6479	175	6129	144
GABPA	HeLa-S3	None	ENCODE	ENCSR000BHS	ENCSR000BMM	10511	384	10544	372
GABPA	H1-hESC	None	ENCODE	ENCSR000BIW	ENCSR000BHL	36807	1030	36336	940
GABPA	HepG2	None	ENCODE	ENCSR000BJK	ENCSR000BLH	9795	522	8847	458
GABPA	K562	None	ENCODE	ENCSR000BLO	ENCSR000BLJ	37501	3047	35912	2846
GABPA	A549	ethanol	ENCODE	ENCSR000BPY	ENCSR000BPD	20807	1179	21369	1166
GABPA	GM12878	None	ENCODE	ENCSR331HPA	ENCSR000BVP	40201	2881	37805	2699
GATA1	K562	None	ENCODE	ENCSR000EWM	ENCSR000EWK	11920	1645	11281	1539
GATA1	PBDE	None	ENCODE	ENCSR000EXP	ENCSR000EXN	45722	8095	44735	7188
GATA1	PBDEFetal	None	ENCODE	ENCSR000EXR	ENCSR000EXQ	49	2	807	114
GATA2	K562	None	ENCODE	ENCSR000BKM	ENCSR000BLJ	22165	4619	20529	3894
GATA2	K562	None	ENCODE	ENCSR000DKA	ENCSR828WYU	19598	4282	18849	3868
GATA2	HUVEC	None	ENCODE	ENCSR000EVW	ENCSR000EVV	36620	4815	36805	4641
GATA2	K562	None	ENCODE	ENCSR000EWG	ENCSR000EWK	29585	5225	30043	4844
GATA2	SH-SY5Y	None	ENCODE	ENCSR000EYB	ENCSR000EYA	54264	6846	54073	6403
GATA3	T-47D	dimethyl sulfoxide	ENCODE	ENCSR000BMX	ENCSR000BMP	76692	8835	73775	7893
GATA3	SH-SY5Y	None	ENCODE	ENCSR000EXZ	ENCSR000EYA	24834	2493	25156	2500
HNF4A	HepG2	None	ENCODE	ENCSR000BLF	ENCSR000BLG	71786	8092	70913	7480
HNF4G	HepG2	None	ENCODE	ENCSR000BNJ	ENCSR000BLG	41653	4486	41477	4193
IRF1	K562	interferon gamma	ENCODE	ENCSR000EGK	ENCSR000FBB	2890	262	2569	236
IRF1	K562	interferon alpha	ENCODE	ENCSR000EGL	ENCSR000FAA	4130	474	3661	413
IRF1	K562	interferon gamma	ENCODE	ENCSR000EGT	ENCSR000FBA	12003	847	11307	572
IRF3	HeLa-S3	None	ENCODE	ENCSR000EDF	ENCSR000EDI	1452	48	1520	50
IRF3	HepG2	None	ENCODE	ENCSR000EEJ	ENCSR000EEN	288	6	316	5
JUN	H1-hESC	None	ENCODE	ENCSR000ECA	ENCSR000ECG	1024	117	2267	252
JUN	HeLa-S3	None	ENCODE	ENCSR000EDG	ENCSR000EDI	27756	3163	26845	2922
JUN	HepG2	None	ENCODE	ENCSR000EEK	ENCSR000EEN	27062	3339	27627	3409
JUN	HUVEC	None	ENCODE	ENCSR000EFA	ENCSR000EZS	45119	4710	45404	4688
JUN	K562	None	ENCODE	ENCSR000EFS	ENCSR000EHI	44015	4895	42450	4455
JUN	K562	interferon alpha	ENCODE	ENCSR000EGH	ENCSR000FAB	6794	812	6290	668
JUN	K562	interferon gamma	ENCODE	ENCSR000EZT	ENCSR000FBB	9118	1330	8874	1194
JUN	K562	interferon gamma	ENCODE	ENCSR000EZW	ENCSR000FBA	6365	887	6378	852
JUN	K562	interferon alpha	ENCODE	ENCSR000EZX	ENCSR000FAA	4309	558	4080	493
JUNB	K562	None	ENCODE	ENCSR000DJY	ENCSR828WYU	30091	4290	31088	4086
JUND	HepG2	None	ENCODE	ENCSR000BGK	ENCSR000BLN	56320	4155	55358	3831
JUND	H1-hESC	None	ENCODE	ENCSR000BKP	ENCSR000BHL	26505	1724	30619	1740
JUND	K562	None	ENCODE	ENCSR000DJX	ENCSR828WYU	63413	9017	63301	8376
JUND	GM12878	None	ENCODE	ENCSR000DYS	ENCSR000EAB	5220	277	5430	298
JUND	H1-hESC	None	ENCODE	ENCSR000EBZ	ENCSR000ECG	27366	2606	25909	2263
JUND	HeLa-S3	None	ENCODE	ENCSR000EDH	ENCSR000EDI	57125	6245	55386	5755
JUND	HepG2	None	ENCODE	ENCSR000EEI	ENCSR000EEN	102037	13928	102142	13784
JUND	K562	None	ENCODE	ENCSR000EGN	ENCSR000EHI	85564	10926	83709	10055
MAFF	HepG2	None	ENCODE	ENCSR000EEC	ENCSR000EEN	94428	12593	92504	10467
MAFF	K562	None	ENCODE	ENCSR000EGI	ENCSR000EHI	33404	4331	33105	4004
MAFK	H1-hESC	None	ENCODE	ENCSR000EBS	ENCSR000ECG	16557	1879	16671	1860
MAFK	HeLa-S3	None	ENCODE	ENCSR000ECK	ENCSR000EDI	22942	1835	18679	1516
MAFK	HepG2	None	ENCODE	ENCSR000EDZ	ENCSR000EEN	71756	9104	71656	7799
MAFK	HepG2	None	ENCODE	ENCSR000EEB	ENCSR000EEN	106854	13732	105471	11732
MAFK	IMR90	None	ENCODE	ENCSR000EFH	ENCSR000EFL	101773	11113	99717	9822
MAFK	K562	None	ENCODE	ENCSR000EGX	ENCSR000EHI	26066	3193	26087	2985
MAX	K562	None	ENCODE	ENCSR000BLP	ENCSR000BGG	155731	26511	134323	21670
MAX	H1-hESC	None	ENCODE	ENCSR000BSJ	ENCSR000BPG	129182	16720	118574	15029
MAX	A549	None	ENCODE	ENCSR000DYG	ENCSR496AXR	15713	572	15702	587
MAX	GM12878	None	ENCODE	ENCSR000DZF	ENCSR000EAF	3717	51	3430	49
MAX	HeLa-S3	None	ENCODE	ENCSR000ECN	ENCSR000EDI	52817	3377	45780	2674
MAX	HepG2	None	ENCODE	ENCSR000EDS	ENCSR000EEN	32701	1537	33459	1604
MAX	HUVEC	None	ENCODE	ENCSR000EEZ	ENCSR000EZS	28006	1722	27737	1837
MAX	K562	None	ENCODE	ENCSR000EFV	ENCSR000EHI	99817	13714	92333	12150
MAX	NB4	None	ENCODE	ENCSR000EHS	ENCSR000FAM	19631	1619	15156	1210
MAX	H1-hESC	None	ENCODE	ENCSR000EUP	ENCSR000EUR	28720	4806	31458	5231
MAX	HeLa-S3	None	ENCODE	ENCSR000EZF	ENCSR000EZM	65587	6504	59219	5575
MEF2A	GM12878	None	ENCODE	ENCSR000BKB	ENCSR000BMS	38411	3190	36407	3026
MEF2A	K562	None	ENCODE	ENCSR000BNV	ENCSR000BLJ	4533	504	4639	493
MEF2C	GM12878	None	ENCODE	ENCSR000BNG	ENCSR000BMS	14649	1075	10894	786
MXI1	GM12878	None	ENCODE	ENCSR000DZI	ENCSR000EAF	6733	103	5700	79
MXI1	H1-hESC	None	ENCODE	ENCSR000EBR	ENCSR000ECG	9671	295	11431	309
MXI1	HeLa-S3	None	ENCODE	ENCSR000ECU	ENCSR000EDI	27079	824	21733	580
MXI1	HepG2	None	ENCODE	ENCSR000EDU	ENCSR000EVT	20427	613	19135	553
MXI1	K562	None	ENCODE	ENCSR000EGZ	ENCSR000EHI	11566	668	12294	644
MYC	GM12878	None	ENCODE	ENCSR000DKU	ENCSR000DKW	2518	3	7256	56
MYC	HeLa-S3	None	ENCODE	ENCSR000DLN	ENCSR000DLP	4896	243	4547	229
MYC	HepG2	None	ENCODE	ENCSR000DLR	ENCSR000DLT	9720	242	10194	258
MYC	HUVEC	None	ENCODE	ENCSR000DLU	ENCSR000DLX	35290	1326	36607	1386
MYC	K562	None	ENCODE	ENCSR000DLZ	ENCSR000DMB	22923	1225	24397	1159
MYC	MCF-7	None	ENCODE	ENCSR000DMJ	ENCSR000DMW	106766	5063	159761	11807
MYC	MCF-7	None	ENCODE	ENCSR000DMM	ENCSR000DMW	112582	2552	100149	4956
MYC	MCF-7	17β-estradiol	ENCODE	ENCSR000DMP	ENCSR000DMW	5026	111	5871	143
MYC	MCF-7	None	ENCODE	ENCSR000DMQ	ENCSR000DMW	50972	2486	50944	2772
MYC	MCF10A-Er-Src	afimoxifene	ENCODE	ENCSR000DOM	ENCSR000DOL	41150	3847	45973	4149
MYC	MCF10A-Er-Src	ethanol	ENCODE	ENCSR000DOS	ENCSR000DOL	75638	6768	78592	6825
MYC	H1-hESC	None	ENCODE	ENCSR000EBY	ENCSR000ECG	3257	170	8207	314
MYC	K562	None	ENCODE	ENCSR000EGJ	ENCSR000EHI	56063	6552	54467	5965
MYC	K562	interferon gamma	ENCODE	ENCSR000EGS	ENCSR000FBB	33188	2980	29775	2293
MYC	NB4	None	ENCODE	ENCSR000EHR	ENCSR000FAM	11223	569	8594	408
MYC	K562	interferon gamma	ENCODE	ENCSR000EZU	ENCSR000FBA	27510	2771	26044	2304
MYC	K562	interferon alpha	ENCODE	ENCSR000EZV	ENCSR000FAA	12972	1035	12295	860
MYC	K562	interferon alpha	ENCODE	ENCSR000FAZ	ENCSR000FAB	7218	611	6781	503
NANOG	H1-hESC	None	ENCODE	ENCSR000BMT	ENCSR000BHL	47185	7036	32287	3867
NFE2	GM12878	None	ENCODE	ENCSR000DZY	ENCSR000EYX	186	9	185	21
NFE2	K562	None	ENCODE	ENCSR000FAF	ENCSR000FAK	6144	750	5375	657
NFE2	K562	None	ENCODE	ENCSR000FCC	ENCSR824WND	57992	8007	55749	7430
NFKB1	GM10847	tumor necrosis factor	ENCODE	ENCSR000DYM	ENCSR000DYL	3226	290	3302	291
NFKB1	GM12878	tumor necrosis factor	ENCODE	ENCSR000EAG	ENCSR000DZH	27360	2686	26348	2456
NFKB1	GM12891	tumor necrosis factor	ENCODE	ENCSR000EAI	ENCSR000EAH	16859	1892	15187	1634
NFKB1	GM12892	tumor necrosis factor	ENCODE	ENCSR000EAN	ENCSR000EAL	4248	318	4140	292
NFKB1	GM15510	tumor necrosis factor	ENCODE	ENCSR000EAQ	ENCSR000EAP	2601	155	3044	169
NFKB1	GM18505	tumor necrosis factor	ENCODE	ENCSR000EAW	ENCSR000EAT	3113	305	3239	303
NFKB1	GM18526	tumor necrosis factor	ENCODE	ENCSR000EBA	ENCSR000EAX	1004	82	1071	81
NFKB1	GM18951	tumor necrosis factor	ENCODE	ENCSR000EBD	ENCSR000EBB	6507	570	6823	539
NFKB1	GM19099	tumor necrosis factor	ENCODE	ENCSR000EBI	ENCSR000EBF	10405	860	11729	876
NFKB1	GM19193	tumor necrosis factor	ENCODE	ENCSR000EBM	ENCSR000EBJ	5106	475	5311	453
NFYA	GM12878	None	ENCODE	ENCSR000DNN	ENCSR000EAF	679	19	1036	62
NFYA	HeLa-S3	None	ENCODE	ENCSR000DNS	ENCSR000EDI	8688	1737	7658	1261
NFYA	K562	None	ENCODE	ENCSR000EGR	ENCSR000FAK	6295	3405	3689	1240
NFYB	GM12878	None	ENCODE	ENCSR000DNM	ENCSR000EAF	13738	6941	10394	4206
NFYB	HeLa-S3	None	ENCODE	ENCSR000DNR	ENCSR000EDI	12504	6079	9127	3287
NFYB	K562	None	ENCODE	ENCSR000EGQ	ENCSR000FAK	18097	9849	16397	8702
NR2C2	GM12878	None	ENCODE	ENCSR000EUL	ENCSR000EYX	115	2	342	6
NR2C2	HeLa-S3	None	ENCODE	ENCSR000EVN	ENCSR000EZM	2439	136	1892	101
NR2C2	HepG2	None	ENCODE	ENCSR000EVS	ENCSR000EVT	3730	134	3743	137
NR2C2	K562	None	ENCODE	ENCSR000EWH	ENCSR000EWK	1090	11	724	15
NR3C1	A549	dexamethasone	ENCODE	ENCSR000BHE	ENCSR000BNC	932	28	1705	63
NR3C1	A549	dexamethasone	ENCODE	ENCSR000BHF	ENCSR000BNC	30759	2750	30827	2419
NR3C1	A549	dexamethasone	ENCODE	ENCSR000BHG	ENCSR000BNC	10113	781	9933	749
NR3C1	A549	ethanol	ENCODE	ENCSR000BIO	ENCSR000BNC	172	3	117	2
NR3C1	ECC-1	dexamethasone	ENCODE	ENCSR000BJC	ENCSR000BKX	35536	2294	37649	2244
NR3C1	A549	ethanol	ENCODE	ENCSR000BJT	ENCSR000BKZ	9614	132	10084	137
NR3C1	ECC-1	ethanol	ENCODE	ENCSR000BLB	ENCSR000BKX	3478	72	8062	194
NRF1	GM12878	None	ENCODE	ENCSR000DZO	ENCSR000EAF	3708	26	3457	22
NRF1	H1-hESC	None	ENCODE	ENCSR000ECC	ENCSR000ECG	4679	38	4594	38
NRF1	HeLa-S3	None	ENCODE	ENCSR000EDJ	ENCSR000EZJ	4715	49	3383	44
NRF1	HepG2	None	ENCODE	ENCSR000EEH	ENCSR000EEN	2088	12	2304	15
NRF1	K562	None	ENCODE	ENCSR000EHH	ENCSR000EHI	5179	148	5092	133
PAX5	GM12878	None	ENCODE	ENCSR000BHD	ENCSR000BGH	84504	7343	76993	6432
PAX5	GM12878	None	ENCODE	ENCSR000BHJ	ENCSR000BGH	73789	6002	72137	5869
PAX5	GM12891	None	ENCODE	ENCSR000BJH	ENCSR000BLC	22837	1484	23677	1524
PAX5	GM12892	None	ENCODE	ENCSR000BJI	ENCSR000BIG	36139	1311	32904	1186
PBX3	GM12878	None	ENCODE	ENCSR000BGR	ENCSR000BGH	51734	3856	52590	3872
POU2F2	GM12878	None	ENCODE	ENCSR000BGP	ENCSR000BGH	99826	8456	102984	8646
POU2F2	GM12891	None	ENCODE	ENCSR000BII	ENCSR000BIH	12836	782	15342	870
POU5F1	H1-hESC	None	ENCODE	ENCSR000BMU	ENCSR000BHL	1985	560	8530	2200
PRDM1	HeLa-S3	None	ENCODE	ENCSR000ECY	ENCSR000EDI	5626	599	4700	505
REST	GM12878	None	ENCODE	ENCSR000BGF	ENCSR000BGJ	9790	646	8614	599
REST	H1-hESC	None	ENCODE	ENCSR000BHM	ENCSR000BHL	25966	2580	23991	2362
REST	SK-N-SH	None	ENCODE	ENCSR000BJJ	ENCSR000BGN	8330	322	8827	346
REST	HepG2	None	ENCODE	ENCSR000BJL	ENCSR000BLH	6075	419	5643	393
REST	PANC-1	None	ENCODE	ENCSR000BJO	ENCSR000BIN	15693	753	12774	585
REST	PFSK-1	None	ENCODE	ENCSR000BJP	ENCSR000BJU	8939	580	8330	608
REST	HeLa-S3	None	ENCODE	ENCSR000BMN	ENCSR000BMM	23739	1933	25928	2174
REST	K562	None	ENCODE	ENCSR000BMW	ENCSR000BLJ	57882	5419	58509	5017
REST	HepG2	None	ENCODE	ENCSR000BOT	ENCSR000BLG	28135	1697	27972	1663
REST	PFSK-1	None	ENCODE	ENCSR000BOX	ENCSR000BPQ	18017	1358	20574	1557
REST	SK-N-SH	None	ENCODE	ENCSR000BOZ	ENCSR000BPR	83589	4765	84419	5212
REST	PANC-1	None	ENCODE	ENCSR000BPK	ENCSR000BPP	20568	695	20063	659
REST	A549	ethanol	ENCODE	ENCSR000BQP	ENCSR000BPD	50591	2588	49712	2515
REST	GM12878	None	ENCODE	ENCSR000BQS	ENCSR000BNF	9956	493	11989	598
REST	H1-hESC	None	ENCODE	ENCSR663WAR	ENCSR000AMI	7012	578	5734	548
REST	A549	None	ENCODE	ENCSR892DRK	ENCSR787VQB	12927	1086	12585	1056
RFX5	GM12878	None	ENCODE	ENCSR000DZW	ENCSR000EAF	1192	85	1131	87
RFX5	H1-hESC	None	ENCODE	ENCSR000ECF	ENCSR000ECG	1369	201	1965	259
RFX5	HeLa-S3	None	ENCODE	ENCSR000ECX	ENCSR000EDI	39794	2934	33281	2391
RFX5	HepG2	None	ENCODE	ENCSR000EEA	ENCSR000EEN	13514	968	14961	944
RFX5	K562	None	ENCODE	ENCSR000EGO	ENCSR000EHI	1354	127	2223	178
RXRA	HepG2	None	ENCODE	ENCSR000BHU	ENCSR000BLN	43536	4103	40069	3570
RXRA	GM12878	None	ENCODE	ENCSR000BJD	ENCSR000BGH	10639	379	16615	815
RXRA	H1-hESC	None	ENCODE	ENCSR000BJW	ENCSR000BHL	1941	250	5182	527
SIX5	H1-hESC	None	ENCODE	ENCSR000BIQ	ENCSR000BHL	3845	917	3610	897
SIX5	GM12878	None	ENCODE	ENCSR000BJE	ENCSR000BGH	9804	907	11085	1065
SIX5	K562	None	ENCODE	ENCSR000BNW	ENCSR000BLJ	3257	574	3149	558
SIX5	A549	ethanol	ENCODE	ENCSR000BRL	ENCSR000BPD	16964	830	18387	869
SP1	GM12878	None	ENCODE	ENCSR000BHK	ENCSR000BGH	56601	6618	53846	5254
SP1	H1-hESC	None	ENCODE	ENCSR000BIR	ENCSR000BHL	55170	9587	46331	6649
SP1	HepG2	None	ENCODE	ENCSR000BJX	ENCSR000BLN	44781	4884	41258	3894
SP1	K562	None	ENCODE	ENCSR000BKO	ENCSR000BLJ	6593	1032	5737	514
SP2	K562	None	ENCODE	ENCSR000BNL	ENCSR000BGG	5149	433	6034	826
SP2	HepG2	None	ENCODE	ENCSR000BOU	ENCSR000BPH	1460	27	1135	24
SP2	H1-hESC	None	ENCODE	ENCSR000BQG	ENCSR000BPG	2439	133	2350	135
SPI1	GM12878	None	ENCODE	ENCSR000BGQ	ENCSR000BGH	104935	12878	94078	12480
SPI1	K562	None	ENCODE	ENCSR000BGW	ENCSR000BGG	80181	11895	65611	11120
SPI1	GM12891	None	ENCODE	ENCSR000BIJ	ENCSR000BIH	64765	7834	59661	7541
SREBF1	HepG2	insulin and 22-hydroxycholesterol	ENCODE	ENCSR000EEO	ENCSR000EER	1897	215	1576	117
SREBF1	HepG2	pravastatin	ENCODE	ENCSR000EZP	ENCSR000EZR	175	36	319	40
SRF	GM12878	None	ENCODE	ENCSR000BGE	ENCSR000BGJ	5440	702	5086	697
SRF	H1-hESC	None	ENCODE	ENCSR000BIV	ENCSR000BHL	6721	1990	6209	1653
SRF	K562	None	ENCODE	ENCSR000BLK	ENCSR000BLJ	6297	1300	7053	1194
SRF	HepG2	None	ENCODE	ENCSR000BLV	ENCSR000BLG	13386	1836	14440	1692
SRF	GM12878	None	ENCODE	ENCSR000BMI	ENCSR000BMS	16832	1981	16172	1667
STAT1	GM12878	None	ENCODE	ENCSR000DZM	ENCSR000EYX	0	0	1	0
STAT1	K562	interferon gamma	ENCODE	ENCSR000EHJ	ENCSR000FBA	4017	806	3761	612
STAT1	K562	interferon gamma	ENCODE	ENCSR000EHK	ENCSR000FBB	1932	660	1596	491
STAT1	HeLa-S3	interferon gamma	ENCODE	ENCSR000EZK	ENCSR000EZN	21503	4281	18932	3170
STAT1	K562	interferon alpha	ENCODE	ENCSR000FAU	ENCSR000FAA	923	156	994	142
STAT1	K562	interferon alpha	ENCODE	ENCSR000FAV	ENCSR000FAB	798	163	710	148
STAT2	K562	interferon alpha	ENCODE	ENCSR000FAT	ENCSR000FAB	2858	479	2736	420
STAT2	K562	interferon alpha	ENCODE	ENCSR000FBC	ENCSR000FAA	2342	393	2043	318
STAT3	MCF10A-Er-Src	afimoxifene	ENCODE	ENCSR000DOQ	ENCSR000DOL	85593	11374	82066	10325
STAT3	MCF10A-Er-Src	ethanol	ENCODE	ENCSR000DOZ	ENCSR000DOY	29111	2823	33628	3070
STAT3	MCF10A-Er-Src	afimoxifene	ENCODE	ENCSR000DPB	ENCSR000DOY	94219	12599	91247	11506
STAT3	GM12878	None	ENCODE	ENCSR000DZV	ENCSR000EAF	8	1	39	5
STAT3	HeLa-S3	None	ENCODE	ENCSR000EDC	ENCSR000EDI	27064	2843	21764	2262
TAL1	K562	None	ENCODE	ENCSR000EHB	ENCSR000EHM	40492	8541	35321	6951
TCF12	GM12878	None	ENCODE	ENCSR000BGZ	ENCSR000BGH	73804	5906	71197	5533
TCF12	H1-hESC	None	ENCODE	ENCSR000BIT	ENCSR000BHL	47638	6637	44742	4969
TCF12	HepG2	None	ENCODE	ENCSR000BJG	ENCSR000BLN	11269	792	15891	1314
TCF12	A549	ethanol	ENCODE	ENCSR000BQQ	ENCSR000BPD	66306	5375	69910	5403
TCF7L2	HCT-116	None	ENCODE	ENCSR000EUV	ENCSR000EUX	55024	4537	54208	4327
TCF7L2	HEK293	None	ENCODE	ENCSR000EUY	ENCSR000EVA	10068	758	9739	702
TCF7L2	HeLa-S3	None	ENCODE	ENCSR000EVE	ENCSR000EVH	19619	1585	19918	1569
TCF7L2	HeLa-S3	None	ENCODE	ENCSR000EVF	ENCSR000EVH	3059	210	3014	202
TCF7L2	HepG2	None	ENCODE	ENCSR000EVQ	ENCSR000EVT	2390	260	2290	256
TCF7L2	MCF-7	None	ENCODE	ENCSR000EWT	ENCSR000EWW	10494	1202	9999	1118
TCF7L2	PANC-1	None	ENCODE	ENCSR000EXL	ENCSR000EXM	29084	2130	31113	2109
THAP1	K562	None	ENCODE	ENCSR000BNN	ENCSR000BLJ	28057	864	26489	1000
USF1	GM12878	None	ENCODE	ENCSR000BGI	ENCSR000BGJ	10524	2428	10044	2259
USF1	HepG2	None	ENCODE	ENCSR000BGM	ENCSR000BLN	44972	9050	44249	8569
USF1	A549	dexamethasone	ENCODE	ENCSR000BHX	ENCSR000BNB	11125	1586	11311	1612
USF1	H1-hESC	None	ENCODE	ENCSR000BIU	ENCSR000BHL	66721	19853	65740	18533
USF1	A549	ethanol	ENCODE	ENCSR000BJB	ENCSR000BNC	16185	2850	15594	2686
USF1	K562	None	ENCODE	ENCSR000BKT	ENCSR000BLJ	47645	12895	48607	12634
USF1	SK-N-SH_RA	all-trans-retinoic acid	ENCODE	ENCSR000BMF	ENCSR000BLQ	51343	8681	57795	9722
USF1	A549	ethanol	ENCODE	ENCSR000BPV	ENCSR000BPD	17951	2423	19014	2428
USF2	GM12878	None	ENCODE	ENCSR000DZU	ENCSR000EAF	4902	678	4653	626
USF2	H1-hESC	None	ENCODE	ENCSR000ECD	ENCSR000ECG	8583	2154	8685	2101
USF2	HeLa-S3	None	ENCODE	ENCSR000ECW	ENCSR000EZJ	23996	3980	23462	3875
USF2	HepG2	None	ENCODE	ENCSR000EEF	ENCSR000EEN	8871	1967	9141	1894
USF2	K562	None	ENCODE	ENCSR000EHG	ENCSR000EHI	3319	1113	3527	1122
YY1	H1-hESC	None	ENCODE	ENCSR000BKD	ENCSR000BHL	83676	13685	80854	12393
YY1	GM12891	None	ENCODE	ENCSR000BKJ	ENCSR000BLC	33581	2369	39642	2983
YY1	K562	None	ENCODE	ENCSR000BKU	ENCSR000BLJ	51160	4235	48300	4107
YY1	GM12892	None	ENCODE	ENCSR000BLT	ENCSR000BIG	51116	6366	48703	5660
YY1	SK-N-SH_RA	all-trans-retinoic acid	ENCODE	ENCSR000BLZ	ENCSR000BLQ	35501	2152	34418	1972
YY1	K562	None	ENCODE	ENCSR000BMH	ENCSR000BGG	79657	15175	65392	12686
YY1	GM12878	None	ENCODE	ENCSR000BNP	ENCSR000BMS	65938	7784	56122	5967
YY1	HepG2	None	ENCODE	ENCSR000BNT	ENCSR000BLG	49811	3020	43291	2798
YY1	HCT-116	None	ENCODE	ENCSR000BNX	ENCSR000BMK	58511	5095	55823	4608
YY1	A549	ethanol	ENCODE	ENCSR000BPM	ENCSR000BPD	34383	2374	36216	2515
YY1	K562	None	ENCODE	ENCSR000EWF	ENCSR000EWK	15150	1710	11479	1415
YY1	NT2-D1	None	ENCODE	ENCSR000EXG	ENCSR000EXF	27479	2486	20884	2051
ZBTB33	GM12878	None	ENCODE	ENCSR000BHC	ENCSR000BGH	7036	660	6565	581
ZBTB33	HepG2	None	ENCODE	ENCSR000BHR	ENCSR000BLN	3353	294	2790	236
ZBTB33	K562	None	ENCODE	ENCSR000BKF	ENCSR000BLJ	3569	733	2833	611
ZBTB33	HepG2	None	ENCODE	ENCSR000BNA	ENCSR000BLG	3063	166	2687	147
ZBTB33	HCT-116	None	ENCODE	ENCSR000BNY	ENCSR000BMK	7643	280	7526	254
ZBTB33	A549	ethanol	ENCODE	ENCSR000BPZ	ENCSR000BPD	12555	465	13903	501
ZBTB7A	K562	None	ENCODE	ENCSR000BME	ENCSR000BLJ	64144	3407	63756	3205
ZBTB7A	HepG2	None	ENCODE	ENCSR000BQA	ENCSR000BLG	36067	1472	35168	1411
ZNF143	GM12878	None	ENCODE	ENCSR000DZL	ENCSR000EYX	17049	1309	14019	1052
ZNF143	H1-hESC	None	ENCODE	ENCSR000EBW	ENCSR000ECG	62686	10810	57659	9101
ZNF143	HeLa-S3	None	ENCODE	ENCSR000ECO	ENCSR000EDI	10613	903	8493	704
ZNF143	K562	None	ENCODE	ENCSR000EGP	ENCSR000EHI	39418	4476	39714	4087
ZNF263	HEK293-T-REx	None	ENCODE	ENCSR000EVD	ENCSR000EVC	115907	11219	114618	11210
ZNF263	K562	None	ENCODE	ENCSR000EWN	ENCSR000EWK	65665	4459	90278	6370
ZNF274	GM08714	None	ENCODE	ENCSR000EUI	ENCSR000EUH	1449	164	1314	148
ZNF274	GM12878	None	ENCODE	ENCSR000EUK	ENCSR000EYX	720	8	589	7
ZNF274	HeLa-S3	None	ENCODE	ENCSR000EVG	ENCSR000EVH	169	1	192	8
ZNF274	HepG2	None	ENCODE	ENCSR000EVR	ENCSR000EVT	434	2	391	2
ZNF274	K562	None	ENCODE	ENCSR000EVX	ENCSR000EWK	4446	245	4185	440
ZNF274	K562	None	ENCODE	ENCSR000EWE	ENCSR000EWK	1033	20	763	20
ZNF274	NT2-D1	None	ENCODE	ENCSR000EWY	ENCSR000EXF	1556	194	1497	393
OTX2	dEN	None	Roadmap	Roadmap_1	Roadmap_100	18937	4605	11903	2659
MYC	dMS	None	Roadmap	Roadmap_2	Roadmap_100	8377	386	4836	201
GATA4	dME	None	Roadmap	Roadmap_3	Roadmap_100	20365	3620	15232	2774
FOXA1	HUES64	None	Roadmap	Roadmap_4	Roadmap_100	10671	1410	6928	1031
CTCF	dMS	None	Roadmap	Roadmap_5	Roadmap_100	60591	5746	63049	5638
SNAI2	HUES64	None	Roadmap	Roadmap_6	Roadmap_100	1697	12	133	2
POU5F1	dEC	None	Roadmap	Roadmap_8	Roadmap_100	2647	20	128	2
SOX2	dMS	None	Roadmap	Roadmap_10	Roadmap_100	6849	1139	3246	706
NANOG	dEN	None	Roadmap	Roadmap_11	Roadmap_100	27003	6190	23713	4714
HNF4A	dEN	None	Roadmap	Roadmap_12	Roadmap_100	25993	3502	21133	2847
CTCF	HUES64	None	Roadmap	Roadmap_13	Roadmap_100	163025	16328	142203	13660
NANOG	HUES64	None	Roadmap	Roadmap_14	Roadmap_100	41083	9409	37894	7357
GATA6	dEN	None	Roadmap	Roadmap_16	Roadmap_100	18116	4368	17124	4022
SMAD1	dEC	None	Roadmap	Roadmap_17	Roadmap_100	5525	68	10205	119
SP1	HUES64	None	Roadmap	Roadmap_19	Roadmap_100	3744	22	4567	14
SMAD1	dME_shGATA4_3	None	Roadmap	Roadmap_20	Roadmap_100	5207	661	2007	368
SMAD1	dEN	None	Roadmap	Roadmap_21	Roadmap_100	27544	706	23133	575
SMAD2/3	HUES64	None	Roadmap	Roadmap_22	Roadmap_100	9853	231	363	16
GATA4	dME	None	Roadmap	Roadmap_24	Roadmap_100	23928	4510	18444	3753
OTX2	dMS	None	Roadmap	Roadmap_25	Roadmap_100	31435	6472	30026	4262
FOXA2	HUES64	None	Roadmap	Roadmap_27	Roadmap_100	9946	1156	4045	526
HAND1	HUES64	None	Roadmap	Roadmap_28	Roadmap_100	3157	101	96	13
KLF5	HUES64	None	Roadmap	Roadmap_29	Roadmap_100	5228	180	2334	82
GATA4	dEN	None	Roadmap	Roadmap_30	Roadmap_100	25633	5411	20763	4335
HAND1	dMS	None	Roadmap	Roadmap_32	Roadmap_100	2941	26	56	0
TCF4	HUES64	None	Roadmap	Roadmap_33	Roadmap_100	18450	3090	12622	2208
OTX2	dEN	None	Roadmap	Roadmap_34	Roadmap_100	21972	1788	17864	1292
GATA4	dEN_shGATA4_2	None	Roadmap	Roadmap_35	Roadmap_100	37043	8093	30163	6519
GATA4	dEN_shGATA4_1	None	Roadmap	Roadmap_36	Roadmap_100	46291	10435	41373	9103
FOXA2	dEN	None	Roadmap	Roadmap_37	Roadmap_100	38494	7091	37226	6192
SMAD2/3	dEC	None	Roadmap	Roadmap_38	Roadmap_100	3231	62	300	1
SP1	HUES64	None	Roadmap	Roadmap_39	Roadmap_100	17008	274	11513	88
LEF1	dMS	None	Roadmap	Roadmap_40	Roadmap_100	3716	477	1511	368
HEY1	dME	None	Roadmap	Roadmap_41	Roadmap_100	3932	39	958	16
HAND1	dME	None	Roadmap	Roadmap_42	Roadmap_100	14839	756	10325	522
EOMES	dEN	None	Roadmap	Roadmap_43	Roadmap_100	24219	5532	16245	3072
SOX17	dEN	None	Roadmap	Roadmap_44	Roadmap_100	16105	3287	10468	2162
GATA4	dME_shGATA4_1	None	Roadmap	Roadmap_45	Roadmap_100	6800	1240	4595	1069
GATA4	dME_shGATA4_2	None	Roadmap	Roadmap_47	Roadmap_100	13379	2550	9023	1892
PAX6	dEN	None	Roadmap	Roadmap_48	Roadmap_100	1946	81	535	71
NANOG	HUES64	None	Roadmap	Roadmap_49	Roadmap_100	96700	15471	81554	11728
POU5F1	dEN	None	Roadmap	Roadmap_50	Roadmap_100	13185	1743	10194	1448
FOXA1	dEN	None	Roadmap	Roadmap_54	Roadmap_100	105709	18133	106617	16791
CTCF	dEC	None	Roadmap	Roadmap_55	Roadmap_100	76710	5721	77674	5489
SOX2	HUES64	None	Roadmap	Roadmap_56	Roadmap_100	5470	991	4848	936
SMAD1	dEN_shGATA4_1	None	Roadmap	Roadmap_57	Roadmap_100	5116	710	3800	625
SMAD1	dEN_shGATA4_2	None	Roadmap	Roadmap_59	Roadmap_100	8528	1253	6673	1042
NANOG	dMS	None	Roadmap	Roadmap_61	Roadmap_100	37971	7690	29780	5187
POU5F1	HUES64	None	Roadmap	Roadmap_62	Roadmap_100	36105	2348	31470	1929
SOX17	HUES64	None	Roadmap	Roadmap_64	Roadmap_100	4026	72	473	18
TCF4	dEC	None	Roadmap	Roadmap_65	Roadmap_100	2781	41	562	6
SMAD1	dME_shGATA4_2	None	Roadmap	Roadmap_66	Roadmap_100	5406	608	2119	332
HAND2	dME	None	Roadmap	Roadmap_67	Roadmap_100	6192	376	2327	193
SMAD1	dME_shGATA4_1	None	Roadmap	Roadmap_68	Roadmap_100	8450	1239	6986	1192
SP1	dEN	None	Roadmap	Roadmap_69	Roadmap_100	10525	87	7396	56
SMAD1	dME	None	Roadmap	Roadmap_71	Roadmap_100	7845	471	3092	195
EOMES	HUES64	None	Roadmap	Roadmap_72	Roadmap_100	11157	2010	7024	989
SMAD4	dME	None	Roadmap	Roadmap_73	Roadmap_100	11478	277	7121	122
OTX2	dEC	None	Roadmap	Roadmap_74	Roadmap_100	4278	334	7342	596
SMAD4	HUES64	None	Roadmap	Roadmap_75	Roadmap_100	20613	304	14383	127
GATA4	dEN	None	Roadmap	Roadmap_76	Roadmap_100	28760	6886	28386	6442
GATA4	HUES64	None	Roadmap	Roadmap_77	Roadmap_100	8945	837	5253	556
CTCF	HUES64	None	Roadmap	Roadmap_78	Roadmap_100	77866	11020	76399	10538
FOXA2	dEN	None	Roadmap	Roadmap_80	Roadmap_100	44088	7537	34356	5549
OTX2	dME	None	Roadmap	Roadmap_81	Roadmap_100	2287	14	28	0
SMAD1	dEN	None	Roadmap	Roadmap_84	Roadmap_100	4008	540	1975	369
SMAD2/3	dEN	None	Roadmap	Roadmap_85	Roadmap_100	3032	217	3398	275
SOX17	dME	None	Roadmap	Roadmap_86	Roadmap_100	7788	527	3681	366
MYC	dEN	None	Roadmap	Roadmap_88	Roadmap_100	10609	360	8020	287
SMAD1	HUES64	None	Roadmap	Roadmap_89	Roadmap_100	18069	2995	11947	1933
SMAD4	dEC	None	Roadmap	Roadmap_90	Roadmap_100	1672	37	1541	7
GATA4	dME_shGATA4_3	None	Roadmap	Roadmap_91	Roadmap_100	26714	5305	22413	4591
GATA6	dME	None	Roadmap	Roadmap_92	Roadmap_100	14743	2672	10411	2107
CTCF	dEN	None	Roadmap	Roadmap_93	Roadmap_100	55195	4746	55210	4682
HNF4A	HUES64	None	Roadmap	Roadmap_94	Roadmap_100	5481	371	2355	206
POU5F1	dMS	None	Roadmap	Roadmap_95	Roadmap_100	7861	1469	5529	1235
SMAD1	dME	None	Roadmap	Roadmap_96	Roadmap_100	9130	1450	5072	907
SOX2	HUES64	None	Roadmap	Roadmap_97	Roadmap_100	10513	1857	6384	1268
SOX2	dEN	None	Roadmap	Roadmap_99	Roadmap_100	4627	550	4464	748
CTCF	dME	None	Roadmap	Roadmap_101	Roadmap_100	46424	3300	42035	2853
SMAD1	dEN_shGATA4_3	None	Roadmap	Roadmap_102	Roadmap_100	4195	538	1997	323
FOXA1	dEN	None	Roadmap	Roadmap_103	Roadmap_100	23149	3803	17855	2874
MYC	HUES64	None	Roadmap	Roadmap_104	Roadmap_100	25794	351	22094	265
HNF1B	dEN	None	Roadmap	Roadmap_105	Roadmap_100	3173	162	1924	250
SMAD1	dMS	None	Roadmap	Roadmap_106	Roadmap_100	13782	2144	9353	1431
NANOG	dEC	None	Roadmap	Roadmap_107	Roadmap_100	3307	32	739	6
EOMES	dMS	None	Roadmap	Roadmap_108	Roadmap_100	17512	4675	15324	2556
EOMES	dEN	None	Roadmap	Roadmap_109	Roadmap_100	13272	2742	8499	1515
PRDM1	dMS	None	Roadmap	Roadmap_111	Roadmap_100	2199	126	1528	136
GATA6	HUES64	None	Roadmap	Roadmap_112	Roadmap_100	2120	25	52	2
OTX2	HUES64	None	Roadmap	Roadmap_113	Roadmap_100	30636	5567	23400	3932
LEF1	dME	None	Roadmap	Roadmap_114	Roadmap_100	25933	729	22461	760
NANOG	dEN	None	Roadmap	Roadmap_115	Roadmap_100	66881	12390	61533	7869
GATA4	dME	None	Roadmap	Roadmap_116	Roadmap_100	23854	4851	19148	4089
EOMES	dMS	None	Roadmap	Roadmap_117	Roadmap_100	16702	4005	9831	1785
HNF1B	dEN	None	Roadmap	Roadmap_118	Roadmap_100	49040	1814	39386	1623
PRDM1	dEN	None	Roadmap	Roadmap_119	Roadmap_100	6980	704	3374	572
PRDM1	HUES64	None	Roadmap	Roadmap_120	Roadmap_100	3556	232	1239	124
OTX2	HUES64	None	Roadmap	Roadmap_121	Roadmap_100	125575	21978	113242	18010
HNF1B	HUES64	None	Roadmap	Roadmap_122	Roadmap_100	36932	867	24852	1042
GATA4	dEN_shGATA4_3	None	Roadmap	Roadmap_124	Roadmap_100	34830	8025	36207	7913
GATA6	dMS	None	Roadmap	Roadmap_125	Roadmap_100	9504	1583	8468	1603
GATA6	dEN	None	Roadmap	Roadmap_126	Roadmap_100	27015	5914	22209	4898
POU5F1	HUES64	None	Roadmap	Roadmap_128	Roadmap_100	25226	5172	23897	4520
SNAI2	dME	None	Roadmap	Roadmap_129	Roadmap_100	35687	1104	24299	683
