# Supplementary material for: Systematic identification and characterization of regulatory elements derived from human endogenous retroviruses
Source: PLoS Genet. 2017 Jul 12;13(7):e1006883. doi: 10.1371/journal.pgen.1006883 (PMC5529029; doi:10.1371/journal.pgen.1006883)
Supplement: S13 Table — (XLSX) [file pgen.1006883.s032.xlsx]

## Sheet: Sheet1
HERV/LTR type
ERV3-16A3_LTR
HERV-Fc1_LTR1
HERV1_LTRa
HERV1_LTRc
HERV1_LTRd
LOR1a
LOR1b
LTR1
LTR10A
LTR10B
LTR10B1
LTR10C
LTR10D
LTR10E
LTR10F
LTR10G
LTR12
LTR12B
LTR12C
LTR12D
LTR12E
LTR12F
LTR12_
LTR13
LTR13A
LTR13_
LTR14
LTR14A
LTR14B
LTR14C
LTR15
LTR16A
LTR16A1
LTR16B
LTR16B1
LTR16B2
LTR17
LTR18A
LTR18B
LTR19-int
LTR19A
LTR19B
LTR1B
LTR1D
LTR2
LTR21A
LTR21B
LTR22
LTR22A
LTR22B
LTR22C
LTR24
LTR24C
LTR26
LTR26B
LTR26E
LTR27
LTR27B
LTR28
LTR2B
LTR2C
LTR3
LTR30
LTR31
LTR32
LTR35A
LTR36
LTR38
LTR38B
LTR38C
LTR3A
LTR3B
LTR3B_
LTR4
LTR40a
LTR40b
LTR40c
LTR42
LTR43
LTR44
LTR45
LTR45B
LTR45C
LTR46
LTR47A
LTR47B
LTR48B
LTR49
LTR51
LTR52
LTR53
LTR54B
LTR55
LTR56
LTR57
LTR58
LTR59
LTR5A
LTR5B
LTR5_Hs
LTR61
LTR62
LTR64
LTR69
LTR6A
LTR6B
LTR7
LTR71A
LTR71B
LTR72
LTR72B
LTR73
LTR75
LTR75_1
LTR76
LTR77
LTR7B
LTR7C
LTR7Y
LTR8
LTR80A
LTR8A
LTR9
LTR9B
MER101
MER11A
MER11B
MER11C
MER11D
MER31A
MER31B
MER34B
MER34C2
MER34D
MER39B
MER4-int
MER41A
MER41B
MER41C
MER41E
MER48
MER4A
MER4A1
MER4A1_
MER4B
MER4C
MER4E
MER4E1
MER50
MER50B
MER51A
MER51B
MER51C
MER51E
MER52A
MER52C
MER57A-int
MER57A1
MER57B1
MER57B2
MER57C1
MER57C2
MER57D
MER57E1
MER57E2
MER57F
MER61A
MER61B
MER61C
MER61D
MER61E
MER61F
MER65A
MER65C
MER66A
MER66B
MER66C
MER66D
MER67D
MER68
MER68B
MER70A
MER70C
MER72
MER72B
MER73
MER74A
MER74C
MER76
MER77
MER77B
MER83
MER83B
MER83C
MER84
MER87
MER87B
MER88
MER92A
MER95
MER9B
MER9a1
MER9a2
MER9a3
MLT1E2
MLT1F1
MLT1F2
MLT1G1
MLT1H1
MLT2A1
MLT2A2
MLT2B1
MLT2B2
MLT2B3
MLT2C1
MLT2C2
MLT2D
MSTA-int
MSTB-int
MSTB2
MSTC
PABL_A
PABL_B
PRIMA4_LTR
THE1A-int
THE1C-int
THE1D-int
